# Supplementary material for: The isolation of novel pregnane steroids from Aglaia pachyphylla Miq. and the cytotoxicity against breast cancer cell lines (MCF-7)
Source: Royal Society of Chemistry journal article supplement (doi:10.1039/d4ra04727c), 2024-01-01
Supplement: d4ra04727c1.pdf [file d4ra04727c1.pdf]

## Supporting Information

The Isolation of novel pregnane steroids from *Aglaia pachyphylla* Miq and the cytotoxicity against breast cancer cell (MCF-7)

Wahyu Safriansyah,<sup>a</sup> Siska Elisahbet Sinaga,<sup>b</sup> Rustaman,<sup>a</sup> Kindi Farabi,<sup>a</sup> Mohamad Nurul Azmi,<sup>c</sup> Rani Maharani,<sup>a</sup> Nurlelasari,<sup>a</sup> Unang Supratman,<sup>a,b</sup> Sofa Fajriah<sup>d</sup> and Desi Harneti<sup>a\*</sup>

<sup>a</sup>Department of Chemistry, Faculty of Mathematics and Natural Sciences, Universitas Padjadjaran, Jatinangor 45363, Indonesia.

<sup>b</sup>Central Laboratory, Universitas Padjadjaran, Jatinangor 45363, Indonesia.

<sup>c</sup>School of Chemical Sciences, Universiti Sains Malaysia, 11800 Minden, Penang, Malaysia.

<sup>d</sup>Research Center for Chemistry, National Research and Innovation Agency (BRIN), Kawasan PUSPITEK Serpong Tangerang, Selatan, 15314, Indonesia.

**\*Corresponding author:** [desi.harneti@unpad.ac.id](mailto:desi.harneti@unpad.ac.id)

|                                                                                                                                                                                                                                                           |    |
|-----------------------------------------------------------------------------------------------------------------------------------------------------------------------------------------------------------------------------------------------------------|----|
| Figure S1 HRTOF-MS spectrum of compound <b>1</b> (range of magnification m/z 320-350).....                                                                                                                                                                | 3  |
| Figure S2 FTIR spectrum of compound <b>1</b> .....                                                                                                                                                                                                        | 4  |
| Figure S3 <sup>1</sup> H NMR spectrum (700 MHz, CDCl <sub>3</sub> ) of compound <b>1</b> .....                                                                                                                                                            | 5  |
| Figure S4 <sup>13</sup> C NMR (175 MHz, CDCl <sub>3</sub> ) and DEPT 135° of compound <b>1</b> .....                                                                                                                                                      | 6  |
| Figure S5 HSQC spectrum of compound <b>1</b> .....                                                                                                                                                                                                        | 7  |
| Figure S6 HMBC spectrum of compound <b>1</b> .....                                                                                                                                                                                                        | 8  |
| Figure S7 <sup>1</sup> H- <sup>1</sup> H COSY spectrum of compound <b>1</b> .....                                                                                                                                                                         | 9  |
| Figure S8 NOESY spectrum of compound <b>1</b> .....                                                                                                                                                                                                       | 10 |
| Figure S9 NMR calculation (DP4+ analysis) of compound <b>1</b> .....                                                                                                                                                                                      | 16 |
| Figure S10 HRTOF-MS spectrum of compound <b>2</b> (range of magnification m/z 319-345).....                                                                                                                                                               | 17 |
| Figure S11 FTIR spectrum of compound <b>2</b> .....                                                                                                                                                                                                       | 18 |
| Figure S12 <sup>1</sup> H NMR (700 MHz, CDCl <sub>3</sub> ) spectrum of compound <b>2</b> .....                                                                                                                                                           | 19 |
| Figure S13 <sup>13</sup> C NMR (175 MHz, CDCl <sub>3</sub> ) and DEPT 135° spectrum of compound <b>2</b> .....                                                                                                                                            | 20 |
| Figure S14 HSQC spectrum of compound <b>2</b> .....                                                                                                                                                                                                       | 21 |
| Figure S15 HMBC spectrum of compound <b>2</b> .....                                                                                                                                                                                                       | 22 |
| Figure S16 COSY spectrum of compound <b>2</b> .....                                                                                                                                                                                                       | 23 |
| Figure S17 NOESY spectrum of compound <b>2</b> .....                                                                                                                                                                                                      | 24 |
| Figure S18 NMR calculation (DP4+ analysis) of compound <b>2</b> .....                                                                                                                                                                                     | 27 |
| Figure S19 TLC profile of compounds <b>1</b> (left) and <b>2</b> (right) in Merck pre-coated silica gel 60 F <sub>254</sub> plates<br>in <i>n</i> -hexane: DCM: EtOAc (7:2:1) at a. UV 254 nm, b. UV 365 nm, c. H <sub>2</sub> SO <sub>4</sub> spray..... | 28 |
| <br>                                                                                                                                                                                                                                                      |    |
| Table S1 Cartesian coordinates for the re-optimized conformers of compound <b>1</b> in the gas phase (Å) at<br>B3LYP/6-31G (d) level.....                                                                                                                 | 11 |
| Table S2 Cartesian coordinates for the re-optimized conformers of compound <b>2</b> in the gas phase (Å) at<br>B3LYP/6-31G (d) level.....                                                                                                                 | 25 |

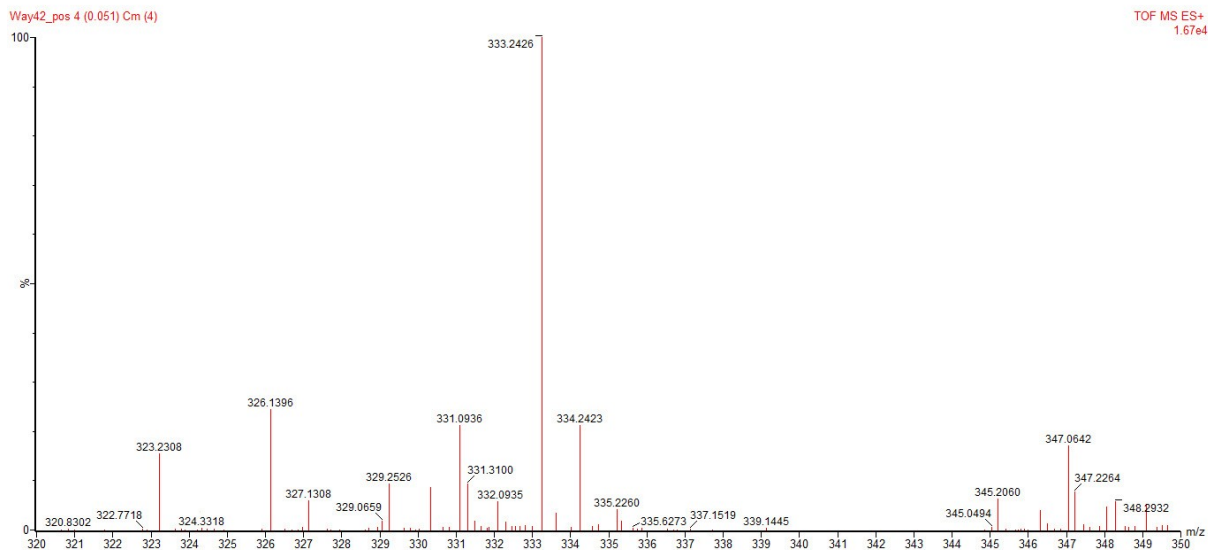

**Elemental Composition Report**

Page 1

**Single Mass Analysis**

Tolerance = 10.0 PPM / DBE: min = -1.5, max = 50.0

Element prediction: Off

Number of isotope peaks used for i-FIT = 3

Monoisotopic Mass, Even Electron Ions

28 formula(e) evaluated with 1 results within limits (up to 3 best isotopic matches for each mass)

Elements Used:

C: 0.35 H: 0.50 O: 0.6

Way42\_pos 4 (0.051) Cm (4)

TOF MS ES+

1.67e+004

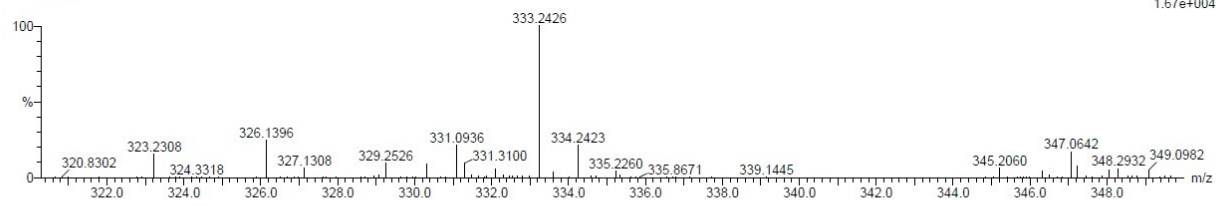

| Mass     | Calc. Mass | mDa  | PPM  | DBE | i-FIT | i-FIT (Norm) | Formula    |
|----------|------------|------|------|-----|-------|--------------|------------|
| 333.2426 | 333.2430   | -0.4 | -1.2 | 5.5 | 83.4  | 0.0          | C21 H33 O3 |

Figure S1 HRTOF-MS spectrum of compound 1 (range of magnification  $m/z$  320-350)

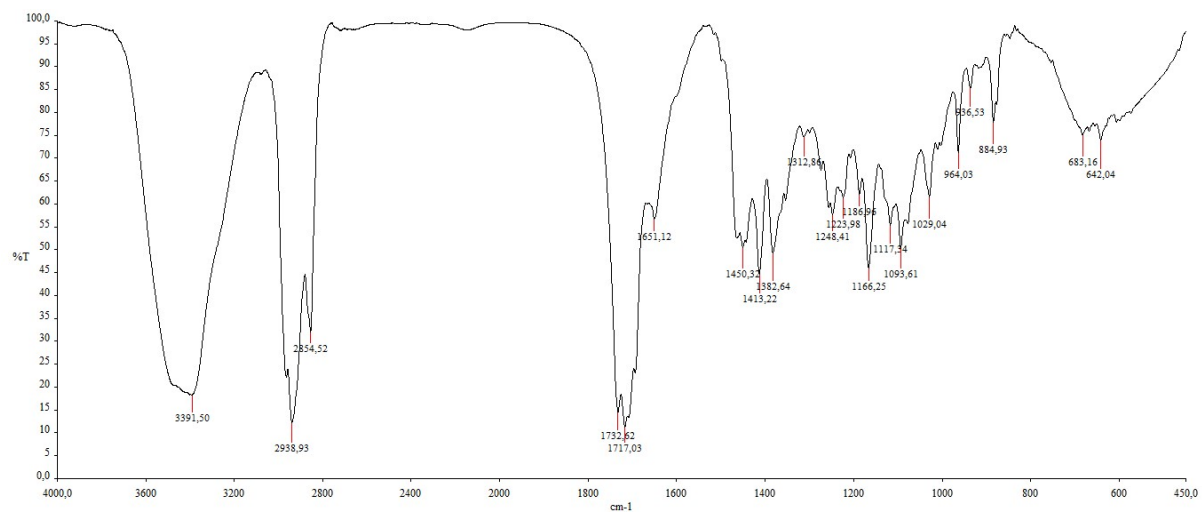

Figure S2 FTIR spectrum of compound 1

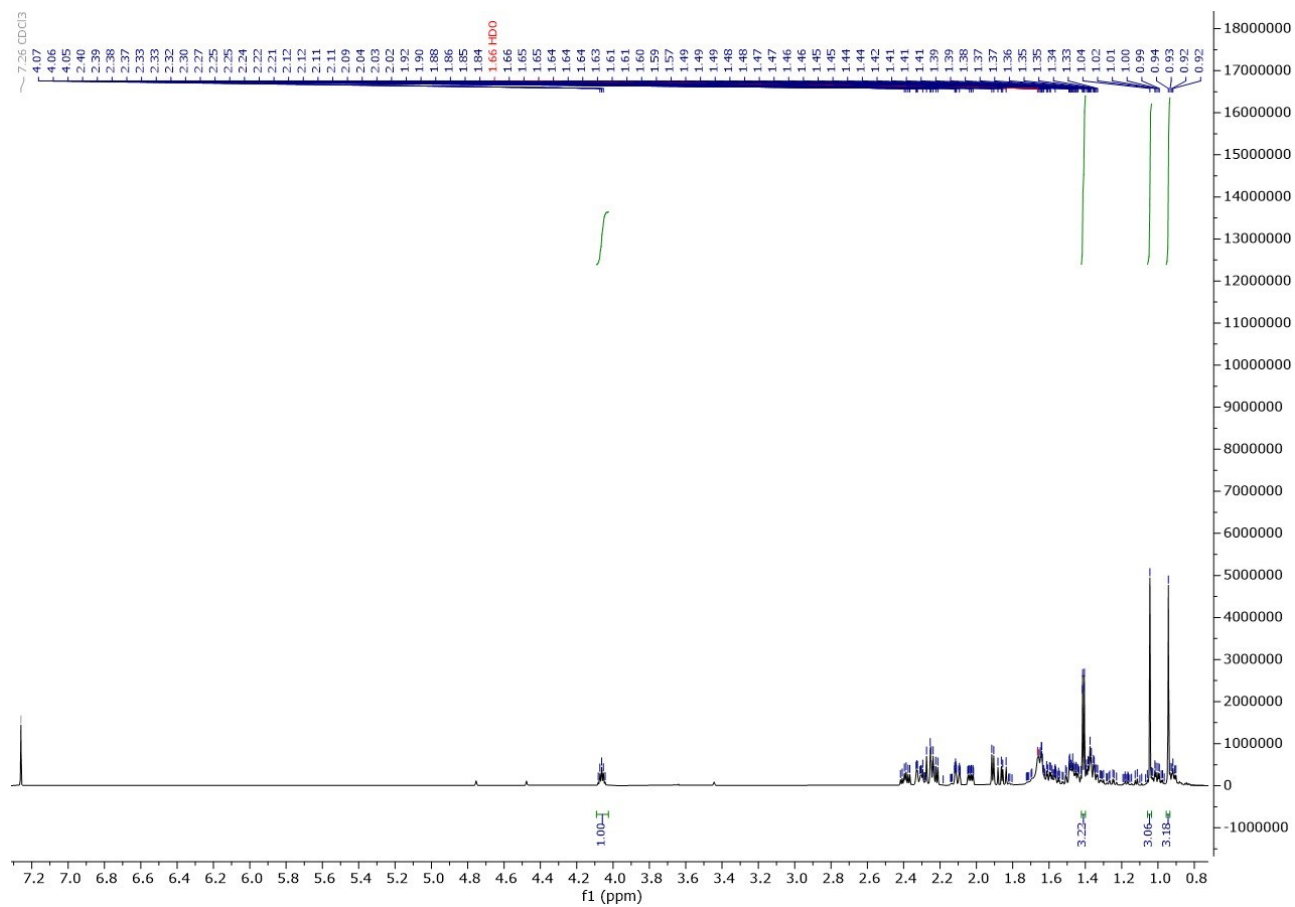

Figure S3 <sup>1</sup>H NMR spectrum (700 MHz, CDCl<sub>3</sub>) of compound **1**

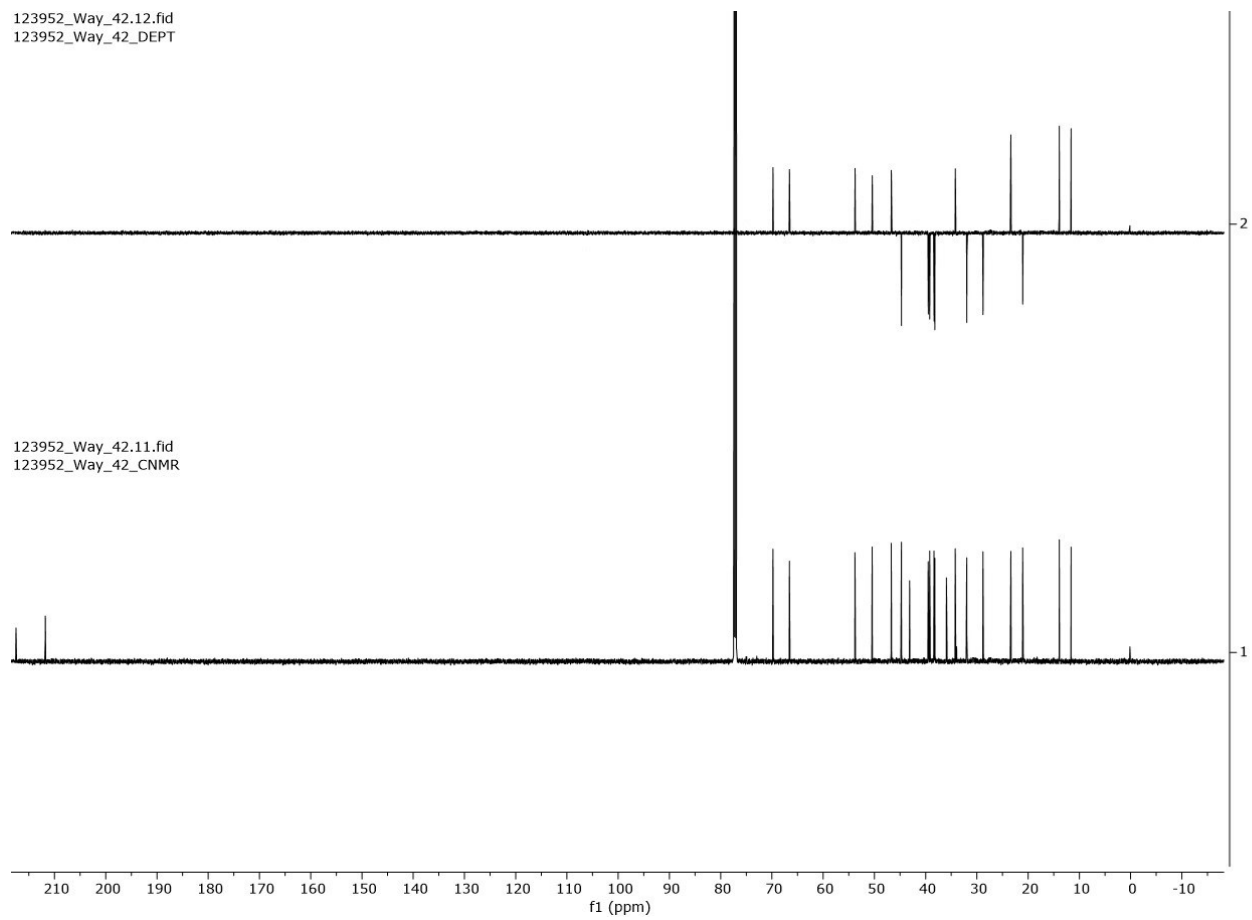

Figure S4  $^{13}\text{C}$  NMR (175 MHz,  $\text{CDCl}_3$ ) and DEPT  $135^\circ$  of compound **1**

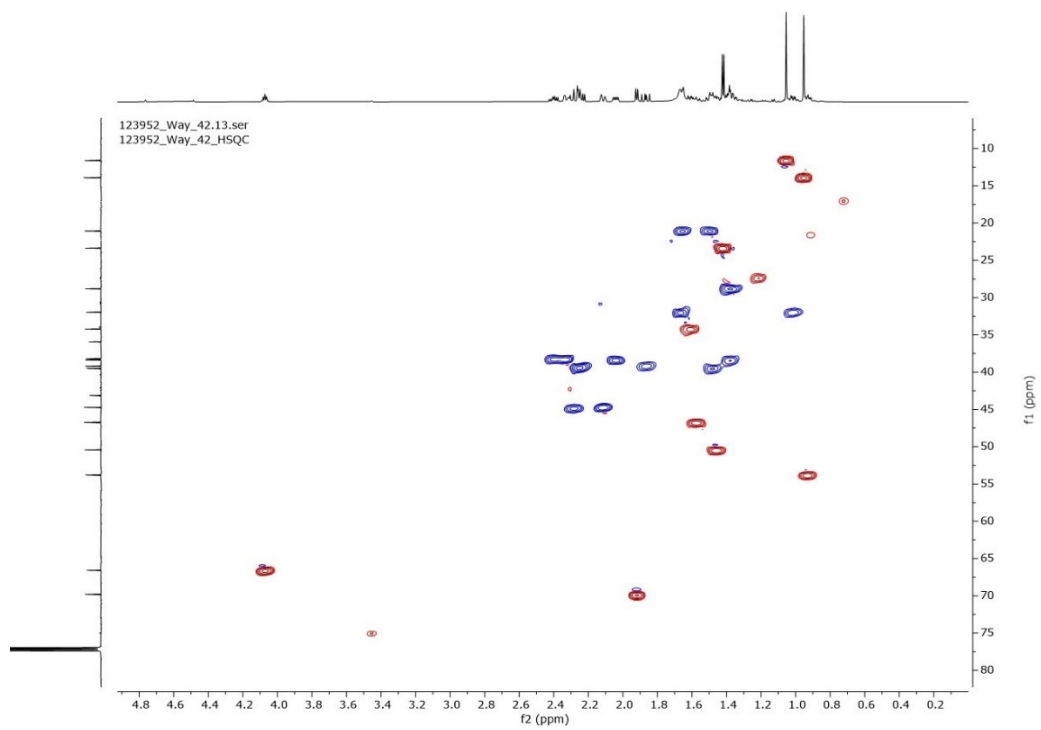

Figure S5 HSQC spectrum of compound 1

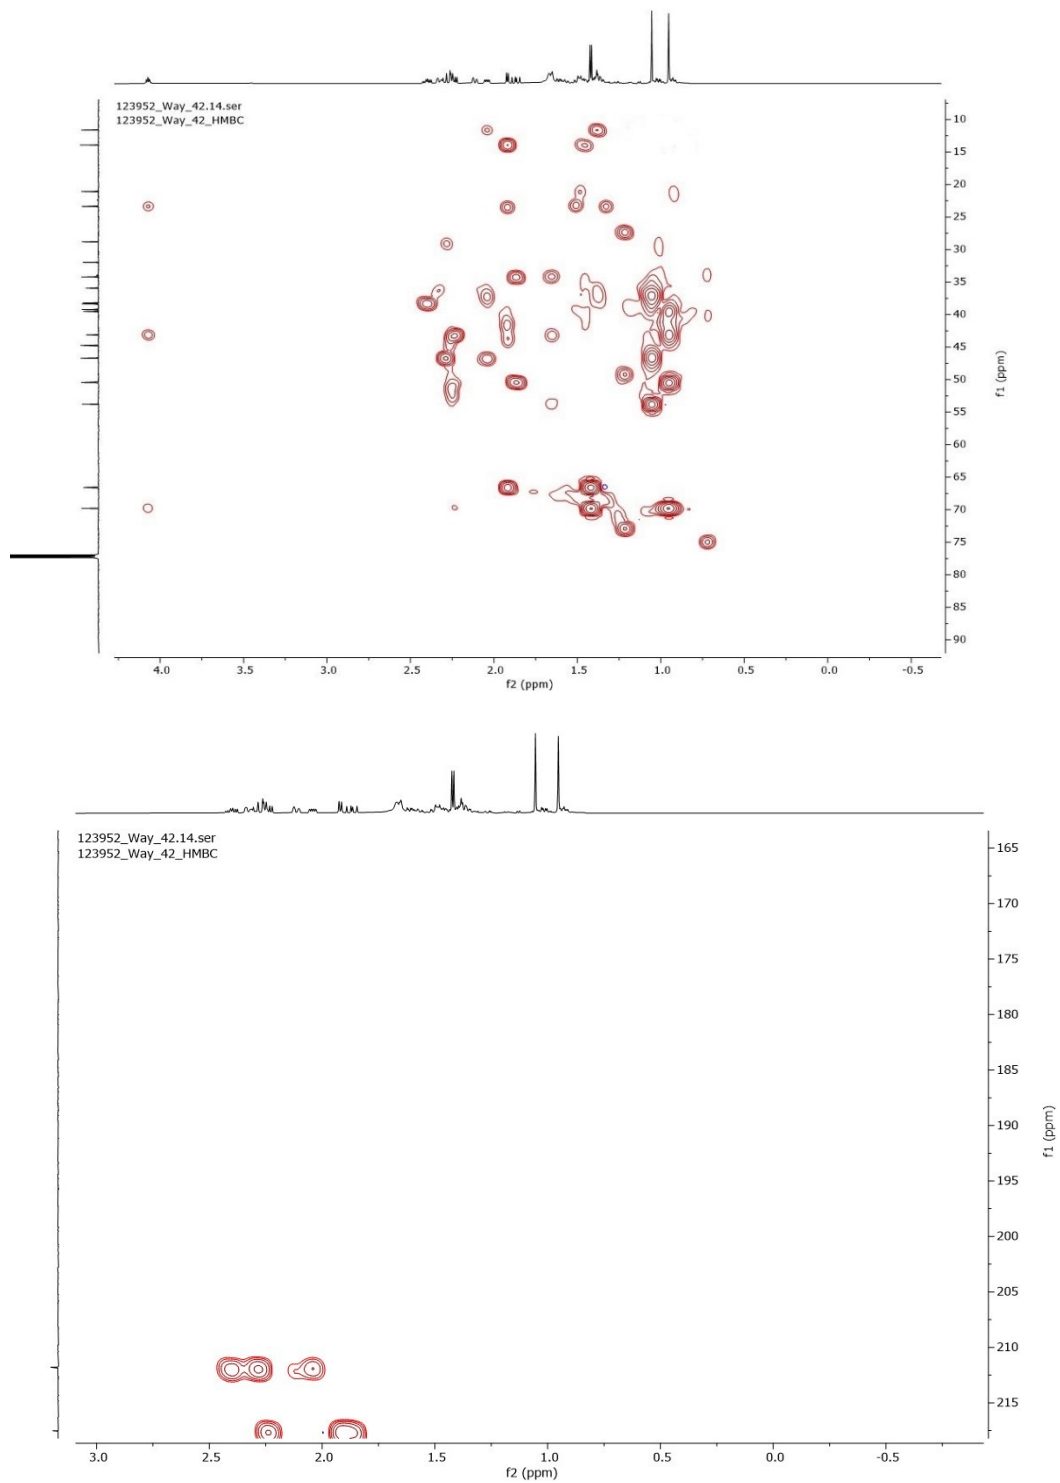

Figure S6. HMBC spectrum of compound 1



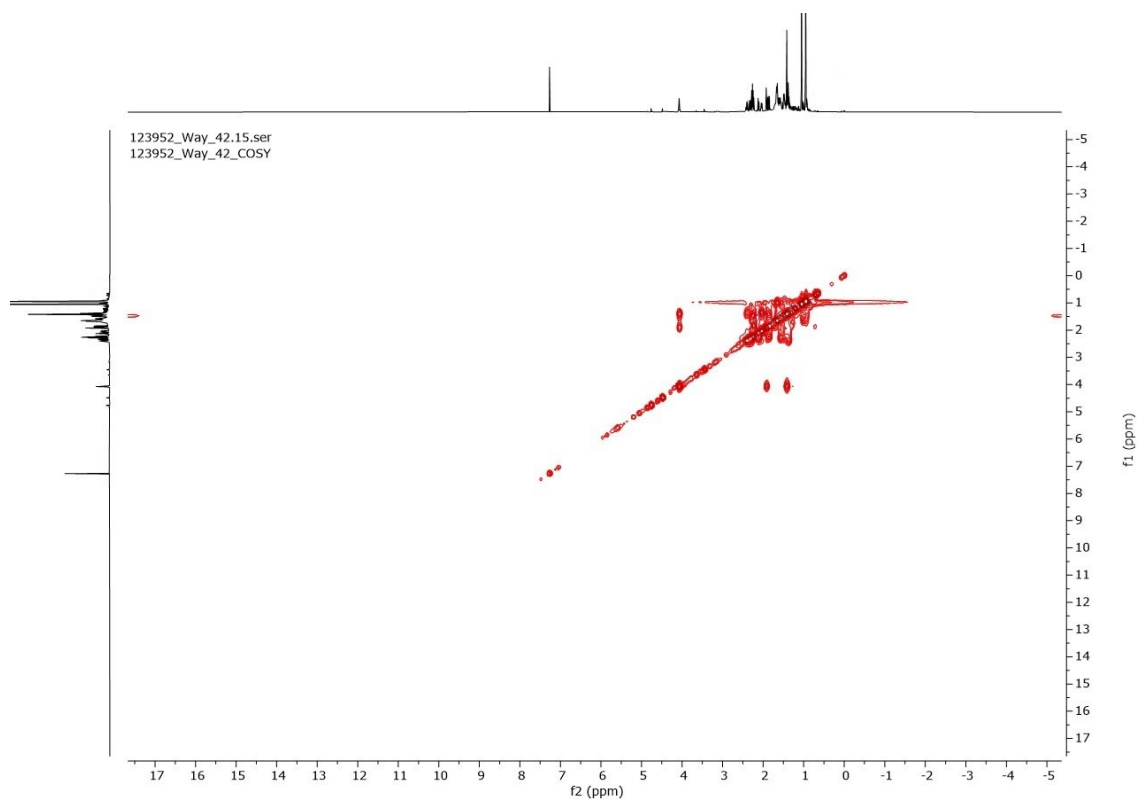

Figure S7  $^1\text{H}$ - $^1\text{H}$  COSY spectrum of compound **1**

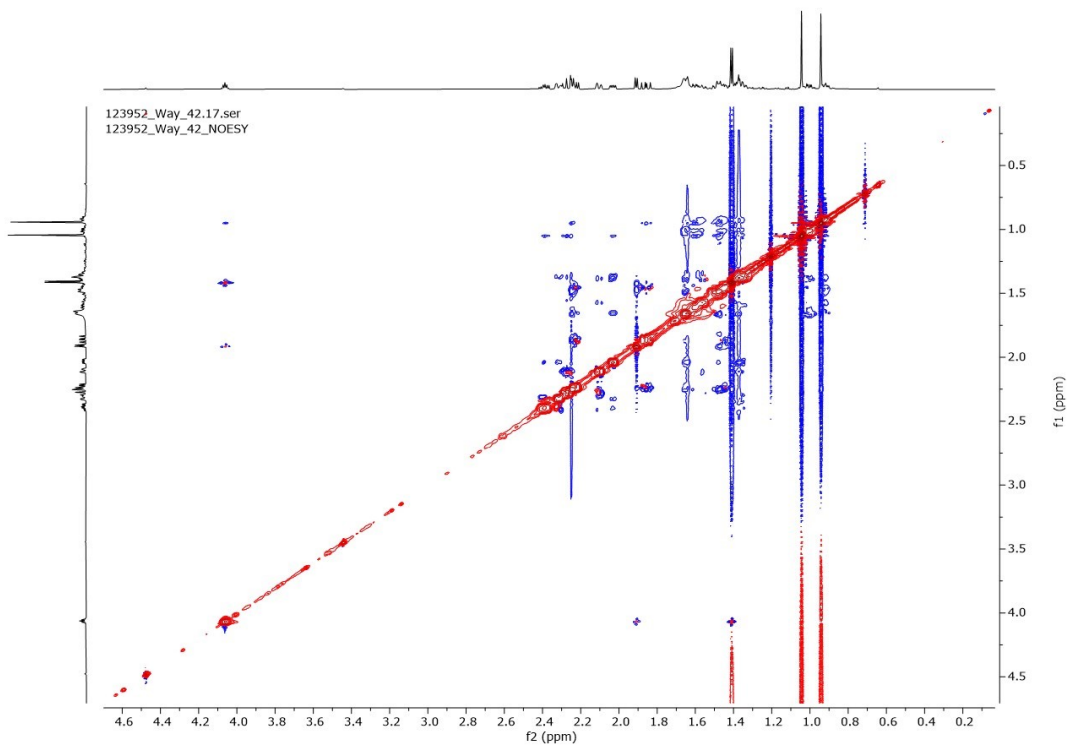

Figure S8 NOESY spectrum of compound **1**

## ECD calculation of compound **1**

Conformation search of **1** at MMFF94s force field gave three conformers **1-1-1-3**. These conformers were optimized at B3LYP/6-31G(d) level, and then calculated the ECD at B3LYP/6-311G(d,p) level, nstates=20, IEFPCM, solvent=methanol.

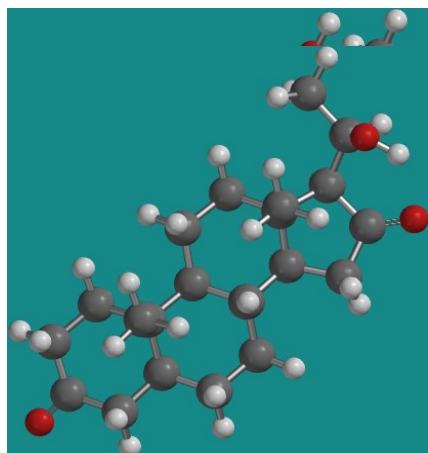

**1-1**

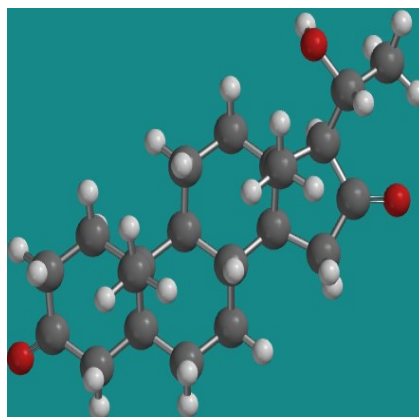

**1-3**

**1-2**

| Conformers | Gibbs Free Energies (Hartree) | Population (%) |
|------------|-------------------------------|----------------|
| <b>1-1</b> | -1045.18765                   | 35.5           |
| <b>1-2</b> | -1045.18775                   | 32.0           |
| <b>1-3</b> | -1045.18773                   | 32.5           |

Table S1 Cartesian coordinates for the re-optimized conformers of compound **1** in the gas phase (Å) at B3LYP/6-31G (d) level.

| Conf-1-1 | Atomic Number | Atomic Type | Coordinates (Angstroms) |          |          |
|----------|---------------|-------------|-------------------------|----------|----------|
|          |               |             | X                       | Y        | Z        |
| 1        | 6             | 0           | 3.163513                | -1.5925  | -0.42059 |
| 2        | 6             | 0           | 3.112608                | 0.904865 | -0.21916 |
| 3        | 6             | 0           | 5.346937                | -0.2715  | -0.51815 |
| 4        | 6             | 0           | 4.63228                 | 0.944405 | 0.052077 |
| 5        | 6             | 0           | 4.692445                | -1.60867 | -0.20535 |
| 6        | 6             | 0           | 2.434137                | -0.41315 | 0.27714  |
| 7        | 6             | 0           | 0.93325                 | -0.36967 | -0.18523 |
| 8        | 6             | 0           | 0.18856                 | 0.906245 | 0.31039  |
| 9        | 6             | 0           | 0.932446                | 2.183791 | -0.11561 |
| 10       | 6             | 0           | 2.408548                | 2.166806 | 0.296972 |
| 11       | 6             | 0           | -1.24683                | 0.880362 | -0.2334  |
| 12       | 6             | 0           | -2.07067                | -0.37322 | 0.196127 |

|    |   |   |          |          |          |
|----|---|---|----------|----------|----------|
| 13 | 6 | 0 | -1.33549 | -1.60887 | -0.35068 |
| 14 | 6 | 0 | 0.130906 | -1.6558  | 0.126651 |
| 15 | 6 | 0 | -3.44648 | -0.04466 | -0.46243 |
| 16 | 6 | 0 | -3.57856 | 1.475179 | -0.21648 |
| 17 | 6 | 0 | -2.18437 | 2.063079 | 0.037577 |
| 18 | 6 | 0 | 2.541901 | -0.58043 | 1.810432 |
| 19 | 6 | 0 | -2.25198 | -0.48445 | 1.727117 |
| 20 | 6 | 0 | -4.6915  | -0.83722 | -0.03923 |
| 21 | 8 | 0 | -4.3238  | -2.22368 | -0.04043 |
| 22 | 6 | 0 | -5.88507 | -0.59672 | -0.96396 |
| 23 | 8 | 0 | -4.61143 | 2.111883 | -0.19872 |
| 24 | 8 | 0 | 6.365313 | -0.18081 | -1.17791 |
| 25 | 1 | 0 | 2.994012 | 0.906104 | -1.31549 |
| 26 | 1 | 0 | 0.96716  | -0.28426 | -1.28537 |
| 27 | 1 | 0 | 0.146851 | 0.895234 | 1.409014 |
| 28 | 1 | 0 | -1.15257 | 0.80847  | -1.33036 |
| 29 | 1 | 0 | -3.32264 | -0.17061 | -1.55198 |
| 30 | 1 | 0 | 2.75723  | -2.55007 | -0.07712 |
| 31 | 1 | 0 | 2.962201 | -1.53979 | -1.5     |
| 32 | 1 | 0 | 4.821426 | 0.980408 | 1.135359 |
| 33 | 1 | 0 | 5.084224 | 1.842091 | -0.38232 |
| 34 | 1 | 0 | 4.914858 | -1.84668 | 0.845257 |
| 35 | 1 | 0 | 5.17163  | -2.3799  | -0.816   |
| 36 | 1 | 0 | 0.434417 | 3.066024 | 0.306008 |
| 37 | 1 | 0 | 0.868891 | 2.285332 | -1.21015 |
| 38 | 1 | 0 | 2.496149 | 2.225867 | 1.390832 |
| 39 | 1 | 0 | 2.916977 | 3.056106 | -0.09817 |
| 40 | 1 | 0 | -1.85441 | -2.52645 | -0.05943 |
| 41 | 1 | 0 | -1.35642 | -1.57401 | -1.45008 |
| 42 | 1 | 0 | 0.151221 | -1.85763 | 1.204424 |
| 43 | 1 | 0 | 0.616299 | -2.51603 | -0.34791 |
| 44 | 1 | 0 | -2.14006 | 2.412609 | 1.078181 |
| 45 | 1 | 0 | -2.02344 | 2.940081 | -0.59743 |
| 46 | 1 | 0 | 1.988743 | 0.189417 | 2.356079 |
| 47 | 1 | 0 | 2.146905 | -1.55237 | 2.124012 |
| 48 | 1 | 0 | 3.578627 | -0.53247 | 2.156965 |
| 49 | 1 | 0 | -2.78219 | 0.3774   | 2.149727 |
| 50 | 1 | 0 | -1.29826 | -0.56549 | 2.254901 |
| 51 | 1 | 0 | -2.83729 | -1.37934 | 1.958821 |
| 52 | 1 | 0 | -4.9699  | -0.53251 | 0.981955 |
| 53 | 1 | 0 | -5.12453 | -2.73285 | 0.162214 |
| 54 | 1 | 0 | -6.75151 | -1.18265 | -0.62859 |
| 55 | 1 | 0 | -5.64024 | -0.90769 | -1.9864  |

| 56       | 1             | 0           | -6.16456                | 0.459239 | -0.96588 |
|----------|---------------|-------------|-------------------------|----------|----------|
| Conf-1-2 | Atomic Number | Atomic Type | Coordinates (Angstroms) |          |          |
|          |               |             | X                       | Y        | Z        |
| 1        | 6             | 0           | 3.161578                | -1.59303 | -0.41805 |
| 2        | 6             | 0           | 3.112112                | 0.904837 | -0.22016 |
| 3        | 6             | 0           | 5.344908                | -0.27307 | -0.522   |
| 4        | 6             | 0           | 4.632262                | 0.943865 | 0.048564 |
| 5        | 6             | 0           | 4.690816                | -1.60951 | -0.2051  |
| 6        | 6             | 0           | 2.433779                | -0.41219 | 0.278965 |
| 7        | 6             | 0           | 0.932353                | -0.36823 | -0.18166 |
| 8        | 6             | 0           | 0.188539                | 0.908922 | 0.312175 |
| 9        | 6             | 0           | 0.933025                | 2.18538  | -0.11591 |
| 10       | 6             | 0           | 2.40944                 | 2.167745 | 0.295454 |
| 11       | 6             | 0           | -1.24701                | 0.883084 | -0.23138 |
| 12       | 6             | 0           | -2.07224                | -0.36886 | 0.198896 |
| 13       | 6             | 0           | -1.33598                | -1.60703 | -0.34093 |
| 14       | 6             | 0           | 0.13066                 | -1.65324 | 0.135694 |
| 15       | 6             | 0           | -3.44744                | -0.04423 | -0.46146 |
| 16       | 6             | 0           | -3.57869                | 1.478586 | -0.22491 |
| 17       | 6             | 0           | -2.18544                | 2.065369 | 0.039422 |
| 18       | 6             | 0           | 2.543068                | -0.57736 | 1.812375 |
| 19       | 6             | 0           | -2.25553                | -0.4773  | 1.730002 |
| 20       | 6             | 0           | -4.69309                | -0.84866 | -0.03275 |
| 21       | 8             | 0           | -4.406                  | -2.24982 | 0.067417 |
| 22       | 6             | 0           | -5.89204                | -0.60846 | -0.94928 |
| 23       | 8             | 0           | -4.61061                | 2.116521 | -0.22181 |
| 24       | 8             | 0           | 6.360827                | -0.18378 | -1.18557 |
| 25       | 1             | 0           | 2.991855                | 0.90474  | -1.31633 |
| 26       | 1             | 0           | 0.964831                | -0.28583 | -1.28212 |
| 27       | 1             | 0           | 0.147284                | 0.899274 | 1.410696 |
| 28       | 1             | 0           | -1.15248                | 0.811531 | -1.32859 |
| 29       | 1             | 0           | -3.3231                 | -0.16548 | -1.55335 |
| 30       | 1             | 0           | 2.755711                | -2.55003 | -0.07236 |
| 31       | 1             | 0           | 2.958828                | -1.54189 | -1.49733 |
| 32       | 1             | 0           | 4.82337                 | 0.980964 | 1.131427 |
| 33       | 1             | 0           | 5.083716                | 1.840853 | -0.3877  |
| 34       | 1             | 0           | 4.914675                | -1.84554 | 0.845594 |
| 35       | 1             | 0           | 5.168538                | -2.38215 | -0.81508 |
| 36       | 1             | 0           | 0.435843                | 3.068209 | 0.305299 |
| 37       | 1             | 0           | 0.868615                | 2.285927 | -1.21051 |
| 38       | 1             | 0           | 2.498086                | 2.227931 | 1.38913  |
| 39       | 1             | 0           | 2.918013                | 3.056253 | -0.10114 |
| 40       | 1             | 0           | -1.85168                | -2.52322 | -0.03599 |

|    |   |   |          |          |          |
|----|---|---|----------|----------|----------|
| 41 | 1 | 0 | -1.35452 | -1.57936 | -1.44152 |
| 42 | 1 | 0 | 0.149084 | -1.85003 | 1.21414  |
| 43 | 1 | 0 | 0.615686 | -2.51584 | -0.33476 |
| 44 | 1 | 0 | -2.14509 | 2.410618 | 1.081577 |
| 45 | 1 | 0 | -2.02133 | 2.944459 | -0.59174 |
| 46 | 1 | 0 | 1.989907 | 0.192727 | 2.35763  |
| 47 | 1 | 0 | 2.149533 | -1.54926 | 2.127977 |
| 48 | 1 | 0 | 3.580093 | -0.52802 | 2.157633 |
| 49 | 1 | 0 | -2.79584 | 0.380689 | 2.147326 |
| 50 | 1 | 0 | -1.30157 | -0.54406 | 2.25946  |
| 51 | 1 | 0 | -2.83101 | -1.37691 | 1.966972 |
| 52 | 1 | 0 | -4.9647  | -0.55959 | 0.987759 |
| 53 | 1 | 0 | -4.29011 | -2.58657 | -0.83599 |
| 54 | 1 | 0 | -6.7467  | -1.20003 | -0.60553 |
| 55 | 1 | 0 | -5.65664 | -0.91335 | -1.97941 |
| 56 | 1 | 0 | -6.1633  | 0.449776 | -0.96116 |

| Conf-1-3 | Atomic Number | Atomic Type | Coordinates (Angstroms) |          |          |
|----------|---------------|-------------|-------------------------|----------|----------|
|          |               |             | X                       | Y        | Z        |
| 1        | 6             | 0           | 3.168228                | -1.59604 | -0.36145 |
| 2        | 6             | 0           | 3.106667                | 0.903168 | -0.18224 |
| 3        | 6             | 0           | 5.351581                | -0.2725  | -0.38139 |
| 4        | 6             | 0           | 4.613857                | 0.946494 | 0.151697 |
| 5        | 6             | 0           | 4.6871                  | -1.60823 | -0.08365 |
| 6        | 6             | 0           | 2.410264                | -0.41205 | 0.29673  |
| 7        | 6             | 0           | 0.929723                | -0.3725  | -0.22727 |
| 8        | 6             | 0           | 0.163154                | 0.904467 | 0.230029 |
| 9        | 6             | 0           | 0.921747                | 2.179883 | -0.17624 |
| 10       | 6             | 0           | 2.380574                | 2.168188 | 0.294308 |
| 11       | 6             | 0           | -1.24779                | 0.870504 | -0.3736  |
| 12       | 6             | 0           | -2.09276                | -0.38093 | 0.036198 |
| 13       | 6             | 0           | -1.33013                | -1.61792 | -0.47195 |
| 14       | 6             | 0           | 0.118906                | -1.65873 | 0.05883  |
| 15       | 6             | 0           | -3.43141                | -0.04581 | -0.6952  |
| 16       | 6             | 0           | -3.5774                 | 1.457212 | -0.40984 |
| 17       | 6             | 0           | -2.19385                | 2.061651 | -0.15766 |
| 18       | 6             | 0           | 2.455186                | -0.56622 | 1.834414 |
| 19       | 6             | 0           | -2.32396                | -0.47054 | 1.562094 |
| 20       | 6             | 0           | -4.76635                | -0.7916  | -0.46028 |
| 21       | 8             | 0           | -5.33297                | -0.50753 | 0.816266 |
| 22       | 6             | 0           | -4.68647                | -2.30785 | -0.59467 |
| 23       | 8             | 0           | -4.63445                | 2.055432 | -0.33215 |

|    |   |   |          |          |          |
|----|---|---|----------|----------|----------|
| 24 | 8 | 0 | 6.393802 | -0.18525 | -1.00302 |
| 25 | 1 | 0 | 3.033781 | 0.895231 | -1.28254 |
| 26 | 1 | 0 | 1.009309 | -0.29317 | -1.32538 |
| 27 | 1 | 0 | 0.076634 | 0.901476 | 1.325929 |
| 28 | 1 | 0 | -1.10628 | 0.785595 | -1.46434 |
| 29 | 1 | 0 | -3.2187  | -0.1198  | -1.77708 |
| 30 | 1 | 0 | 2.749499 | -2.5516  | -0.02724 |
| 31 | 1 | 0 | 3.011525 | -1.55192 | -1.44866 |
| 32 | 1 | 0 | 4.757283 | 0.989545 | 1.241555 |
| 33 | 1 | 0 | 5.082419 | 1.841839 | -0.26958 |
| 34 | 1 | 0 | 4.866584 | -1.83696 | 0.977173 |
| 35 | 1 | 0 | 5.191465 | -2.38389 | -0.66777 |
| 36 | 1 | 0 | 0.406778 | 3.064605 | 0.218839 |
| 37 | 1 | 0 | 0.900982 | 2.273014 | -1.27319 |
| 38 | 1 | 0 | 2.424565 | 2.237182 | 1.390116 |
| 39 | 1 | 0 | 2.903003 | 3.054757 | -0.08825 |
| 40 | 1 | 0 | -1.8385  | -2.54512 | -0.18462 |
| 41 | 1 | 0 | -1.31162 | -1.59915 | -1.57189 |
| 42 | 1 | 0 | 0.098053 | -1.85697 | 1.136706 |
| 43 | 1 | 0 | 0.622268 | -2.51977 | -0.3948  |
| 44 | 1 | 0 | -2.16789 | 2.452265 | 0.868237 |
| 45 | 1 | 0 | -2.01999 | 2.913378 | -0.82364 |
| 46 | 1 | 0 | 1.877385 | 0.206277 | 2.34976  |
| 47 | 1 | 0 | 2.051561 | -1.53698 | 2.140848 |
| 48 | 1 | 0 | 3.476776 | -0.51121 | 2.222268 |
| 49 | 1 | 0 | -2.83483 | 0.412656 | 1.958265 |
| 50 | 1 | 0 | -1.38541 | -0.58228 | 2.111586 |
| 51 | 1 | 0 | -2.96095 | -1.32512 | 1.803697 |
| 52 | 1 | 0 | -5.44612 | -0.41745 | -1.24282 |
| 53 | 1 | 0 | -5.5751  | 0.434154 | 0.79038  |
| 54 | 1 | 0 | -5.6931  | -2.73257 | -0.53119 |
| 55 | 1 | 0 | -4.08889 | -2.74566 | 0.210214 |
| 56 | 1 | 0 | -4.24479 | -2.59745 | -1.5545  |

| Functional |      | Solvent?     |                                                                                           | Basis Set                                                                               |          |   |      |      |      |  |
|------------|------|--------------|-------------------------------------------------------------------------------------------|-----------------------------------------------------------------------------------------|----------|---|------|------|------|--|
| mPW1PW91   |      | PCM          |                                                                                           | 6-311+G(d,p)                                                                            |          |   |      |      |      |  |
|            |      | DP4+         |  100.00% |  0.00% | -        | H | 2.04 | 2.10 | 2.09 |  |
| Nuclei     | sp2? | Experimental | Isomer 1                                                                                  | Isomer 2                                                                                | Isomer 3 | H | 1.37 | 1.42 | 1.41 |  |
| C          |      | 38.2         | 37.0                                                                                      | 36.8                                                                                    |          | H | 2.37 | 2.65 | 2.64 |  |
| C          |      | 38.5         | 37.1                                                                                      | 37.0                                                                                    |          | H | 2.33 | 2.24 | 2.25 |  |
| C          | x    | 211.7        | 216.2                                                                                     | 216.0                                                                                   |          | H | 2.28 | 2.48 | 2.48 |  |
| C          |      | 44.7         | 43.7                                                                                      | 43.6                                                                                    |          | H | 2.11 | 2    | 2.01 |  |
| C          |      | 46.7         | 46.1                                                                                      | 45.9                                                                                    |          | H | 1.58 | 1.6  | 1.58 |  |
| C          |      | 28.8         | 26.8                                                                                      | 26.7                                                                                    |          | H | 1.38 | 1.59 | 1.59 |  |
| C          |      | 31.9         | 30.1                                                                                      | 29.8                                                                                    |          | H | 1.38 | 1.33 | 1.32 |  |
| C          |      | 34.4         | 33.2                                                                                      | 33.2                                                                                    |          | H | 1.66 | 1.75 | 1.73 |  |
| C          |      | 53.8         | 51.7                                                                                      | 51.4                                                                                    |          | H | 1.01 | 1.1  | 1.1  |  |
| C          |      | 35.9         | 36.4                                                                                      | 36.4                                                                                    |          | H | 1.6  | 1.78 | 1.75 |  |
| C          |      | 21           | 19.3                                                                                      | 19.2                                                                                    |          | H | 0.93 | 1.02 | 1.03 |  |
| C          |      | 39.2         | 37.10                                                                                     | 36.60                                                                                   |          | H | 1.65 | 1.6  | 1.59 |  |
| C          |      | 43.1         | 43.50                                                                                     | 41.60                                                                                   |          | H | 1.49 | 1.58 | 1.6  |  |
| C          |      | 50.3         | 47.70                                                                                     | 48.50                                                                                   |          | H | 1.86 | 2.45 | 1.98 |  |
| C          |      | 39.5         | 38.30                                                                                     | 38.20                                                                                   |          | H | 1.86 | 1.54 | 1.58 |  |
| C          | x    | 217.5        | 225.30                                                                                    | 233.50                                                                                  |          | H | 1.46 | 1.58 | 1.66 |  |
| C          |      | 69.7         | 67.30                                                                                     | 69.10                                                                                   |          | H | 1.48 | 2.02 | 2.14 |  |
| C          |      | 13.9         | 7.60                                                                                      | 8.50                                                                                    |          | H | 2.25 | 2.19 | 2.3  |  |
| C          |      | 11.6         | 6.80                                                                                      | 6.70                                                                                    |          | H | 1.91 | 1.96 | 1.65 |  |
| C          |      | 66.5         | 66.00                                                                                     | 64.90                                                                                   |          | H | 0.95 | 0.62 | 1.31 |  |
| C          |      | 23.3         | 20.48                                                                                     | 17.00                                                                                   |          | H | 1.05 | 1.24 | 0.84 |  |
|            |      |              |                                                                                           |                                                                                         |          | H | 4.06 | 4.1  | 4.13 |  |
|            |      |              |                                                                                           |                                                                                         |          | H | 1.42 | 1.21 | 1.04 |  |

| Functional       | Solvent?                                                                                    |                                                                                            | Basis Set    |          |
|------------------|---------------------------------------------------------------------------------------------|--------------------------------------------------------------------------------------------|--------------|----------|
| mPW1PW91         | PCM                                                                                         |                                                                                            | 6-311+G(d,p) |          |
|                  | Isomer 1                                                                                    | Isomer 2                                                                                   | Isomer 3     | Isomer 4 |
| sDP4+ (H data)   |  80.79%  |  19.21% | -            | -        |
| sDP4+ (C data)   |  99.81%  |  0.19%  | -            | -        |
| sDP4+ (all data) |  99.95%  |  0.05%  | -            | -        |
| uDP4+ (H data)   |  69.79%  |  30.21% | -            | -        |
| uDP4+ (C data)   |  100.00% |  0.00%  | -            | -        |
| uDP4+ (all data) |  100.00% |  0.00%  | -            | -        |
| DP4+ (H data)    |  90.67%  |  9.33%  | -            | -        |
| DP4+ (C data)    |  100.00% |  0.00%  | -            | -        |
| DP4+ (all data)  |  100.00% |  0.00%  | -            | -        |

Figure S9 NMR calculation (DP4+ analysis) of compound **1**



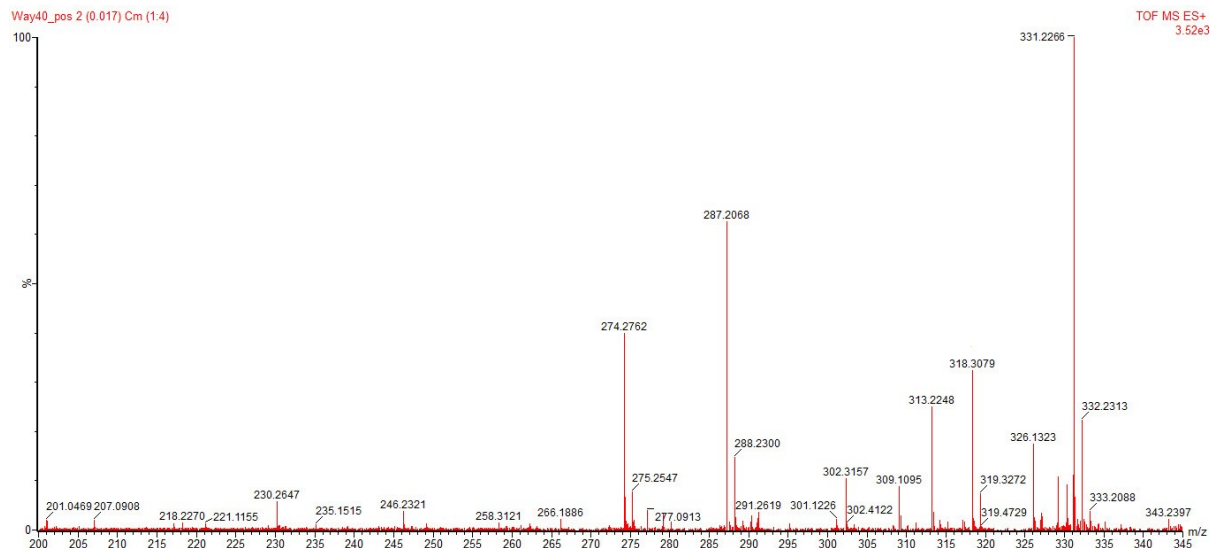

### Elemental Composition Report

Page 1

#### Single Mass Analysis

Tolerance = 10.0 PPM / DBE: min = -1.5, max = 50.0

Element prediction: Off

Number of isotope peaks used for i-FIT = 3

Monoisotopic Mass, Even Electron Ions

20 formula(e) evaluated with 1 results within limits (up to 3 best isotopic matches for each mass)

Elements Used:

C: 0-25 H: 0-35 O: 0-6

Way40\_pos 12 (0.187)

TOF MS ES+

1.44e+003

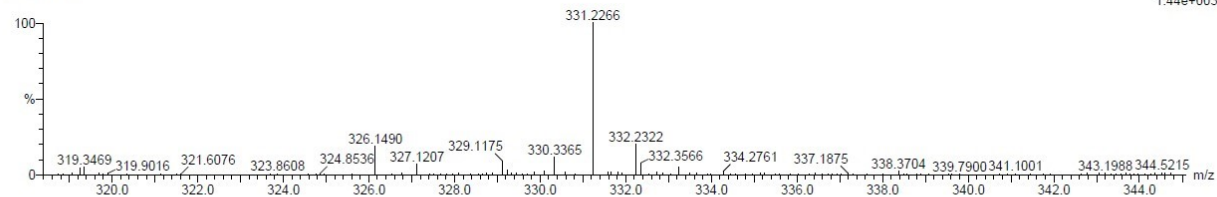

Minimum: -1.5  
Maximum: 5.0 10.0 50.0

| Mass     | Calc. Mass | mDa  | PPM  | DBE | i-FIT | i-FIT (Norm) | Formula    |
|----------|------------|------|------|-----|-------|--------------|------------|
| 331.2266 | 331.2273   | -0.7 | -2.1 | 6.5 | 75.4  | 0.0          | C21 H31 O3 |

Figure S10 HRTOF-MS spectrum of compound 2 (range of magnification  $m/z$  319-345)

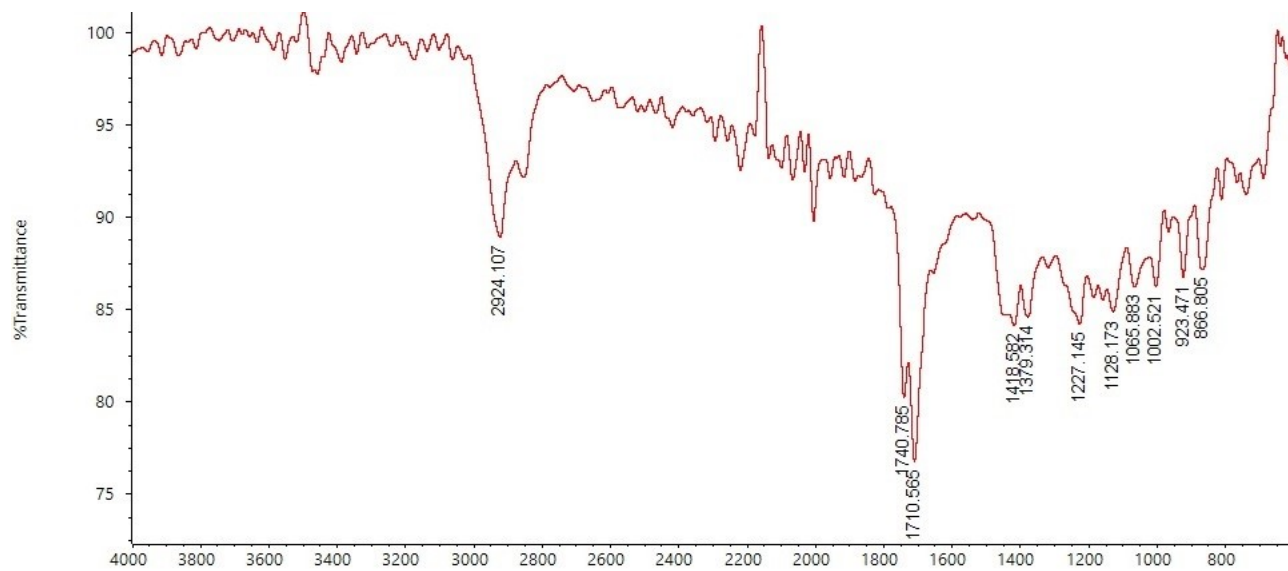

Figure S11 FTIR spectrum of compound **2**

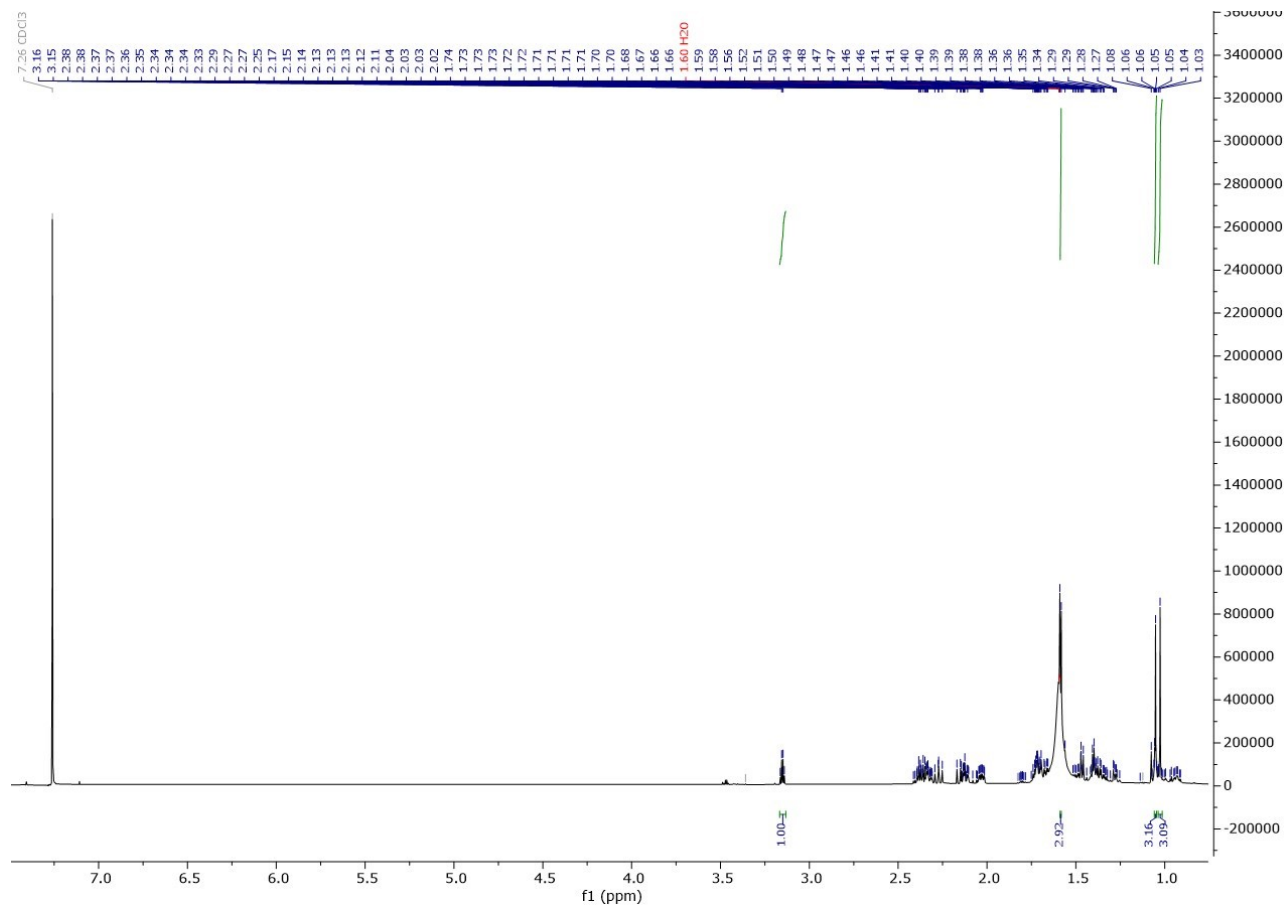

Figure S12 <sup>1</sup>H NMR (700 MHz, CDCl<sub>3</sub>) spectrum of compound **2**

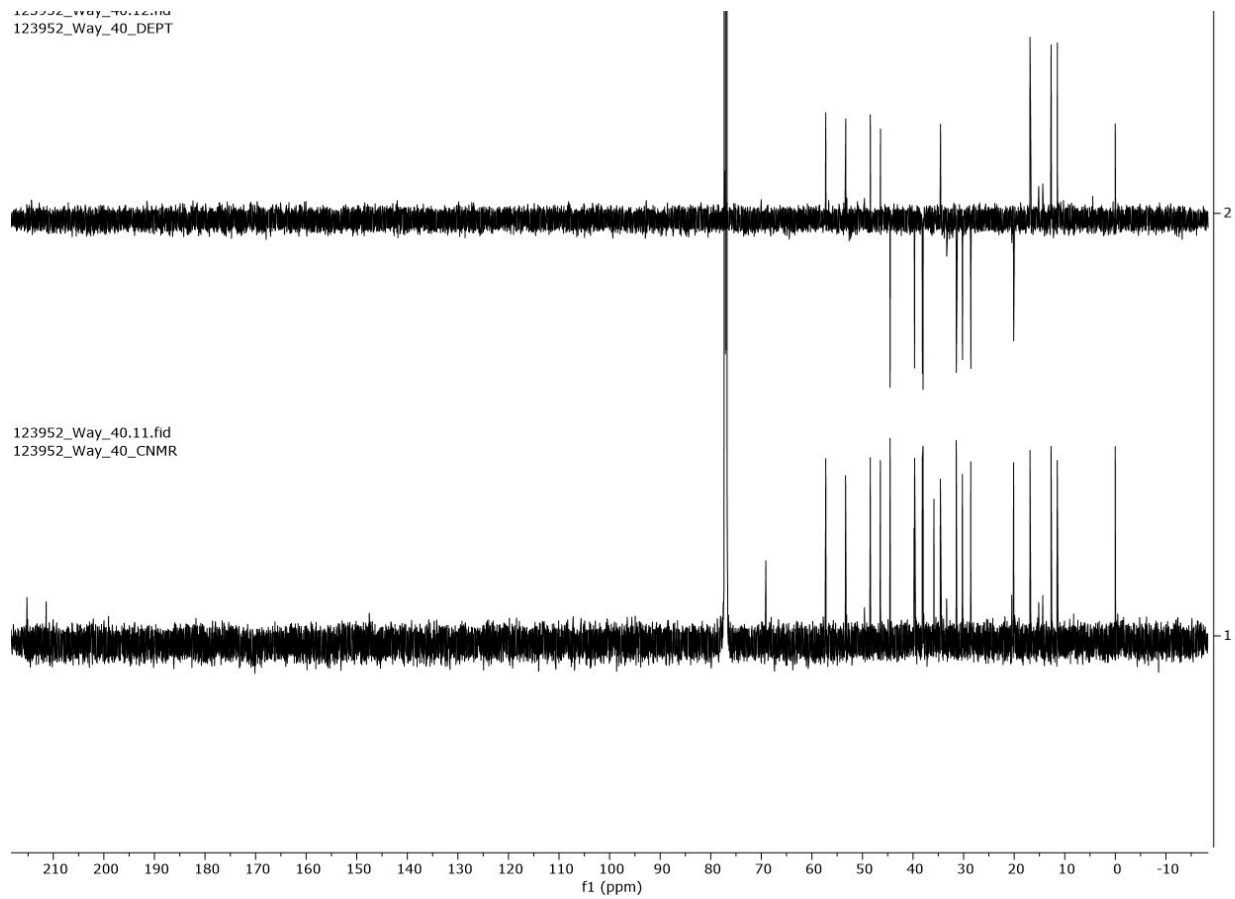

Figure S13  $^{13}\text{C}$  NMR (175 MHz,  $\text{CDCl}_3$ ) and DEPT  $135^\circ$  spectrum of compound **2**

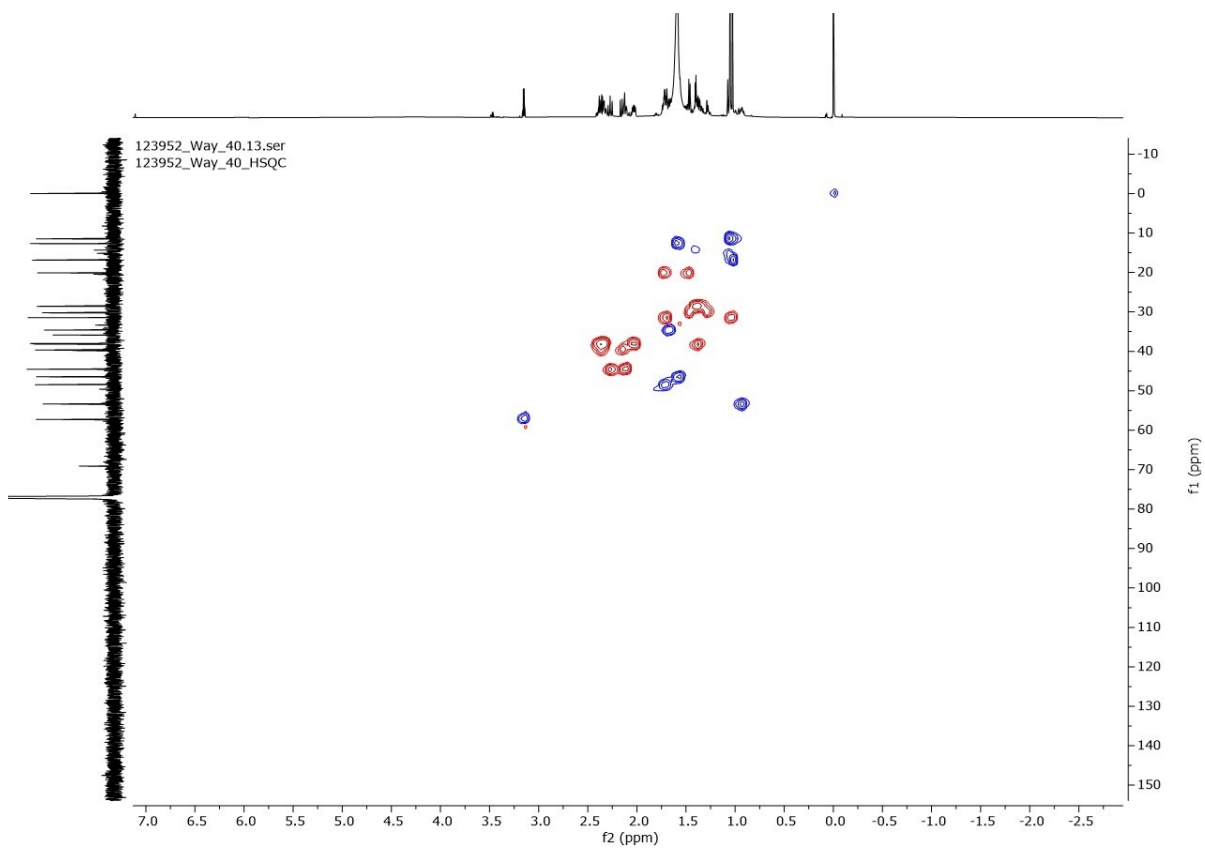

Figure S14 HSQC spectrum of compound **2**

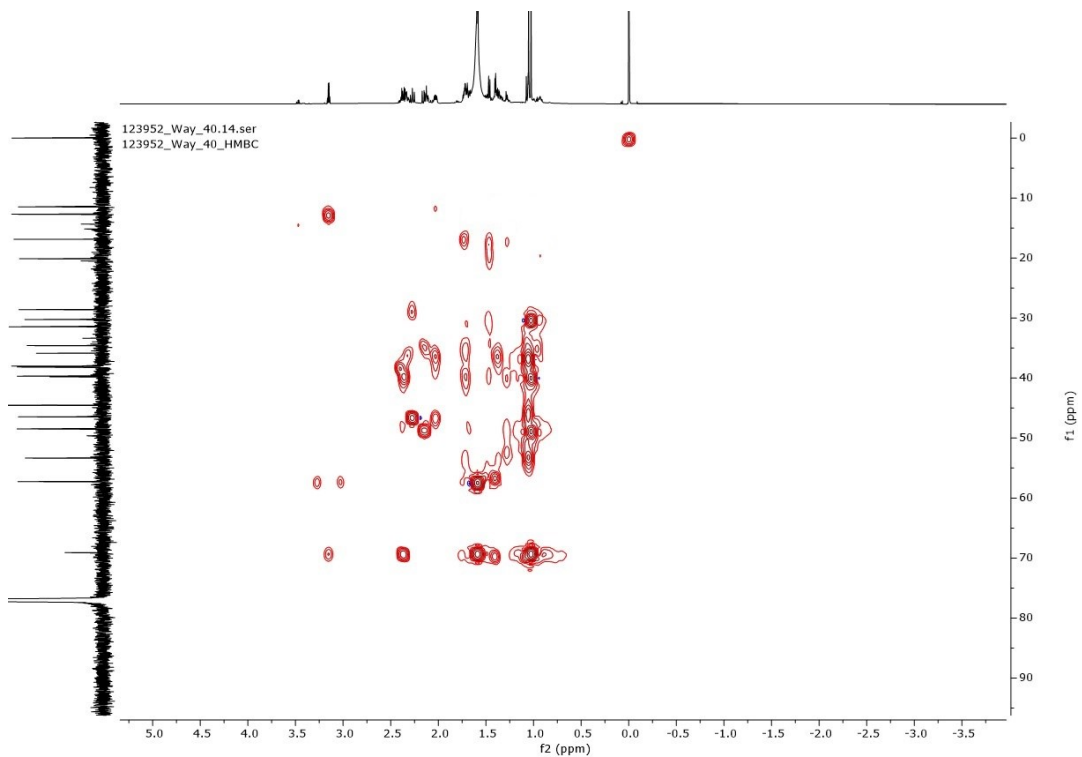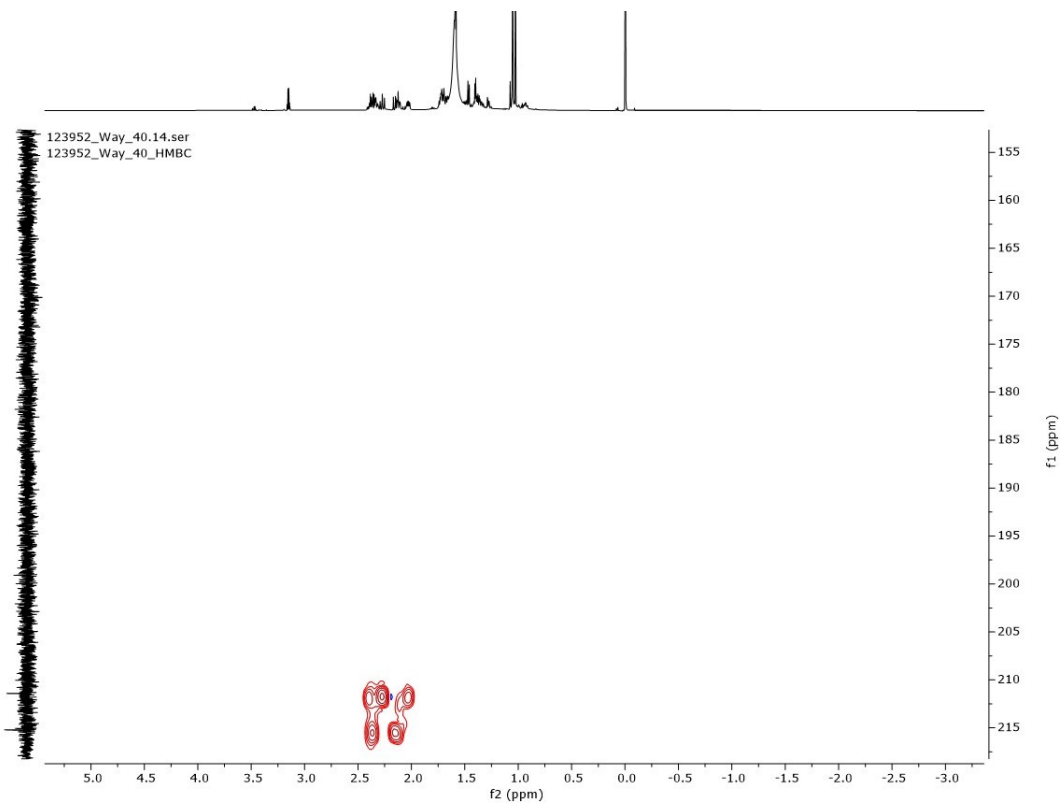

Figure S15 HMBC spectrum of compound 2

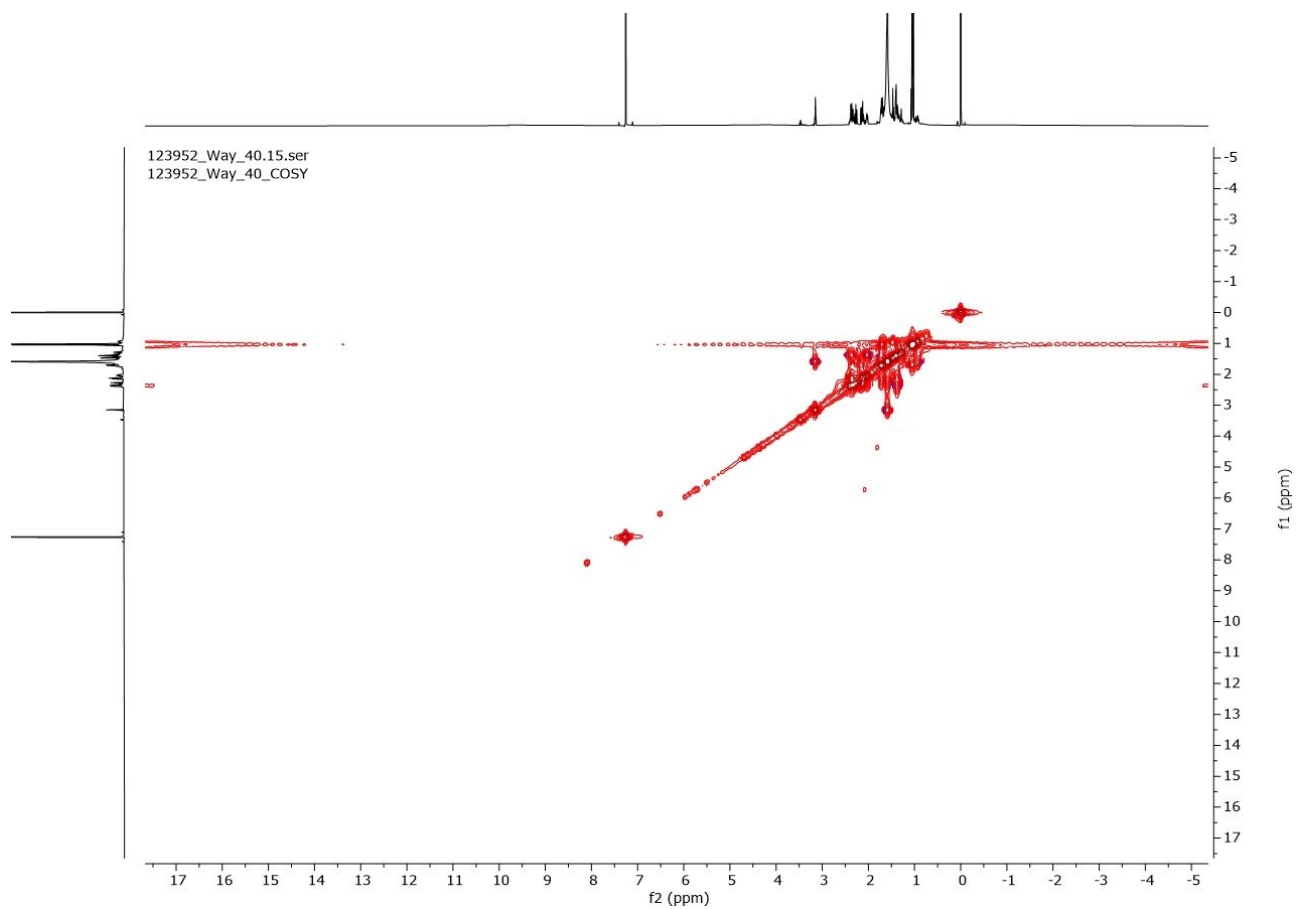

Figure S16 COSY spectrum of compound **2**

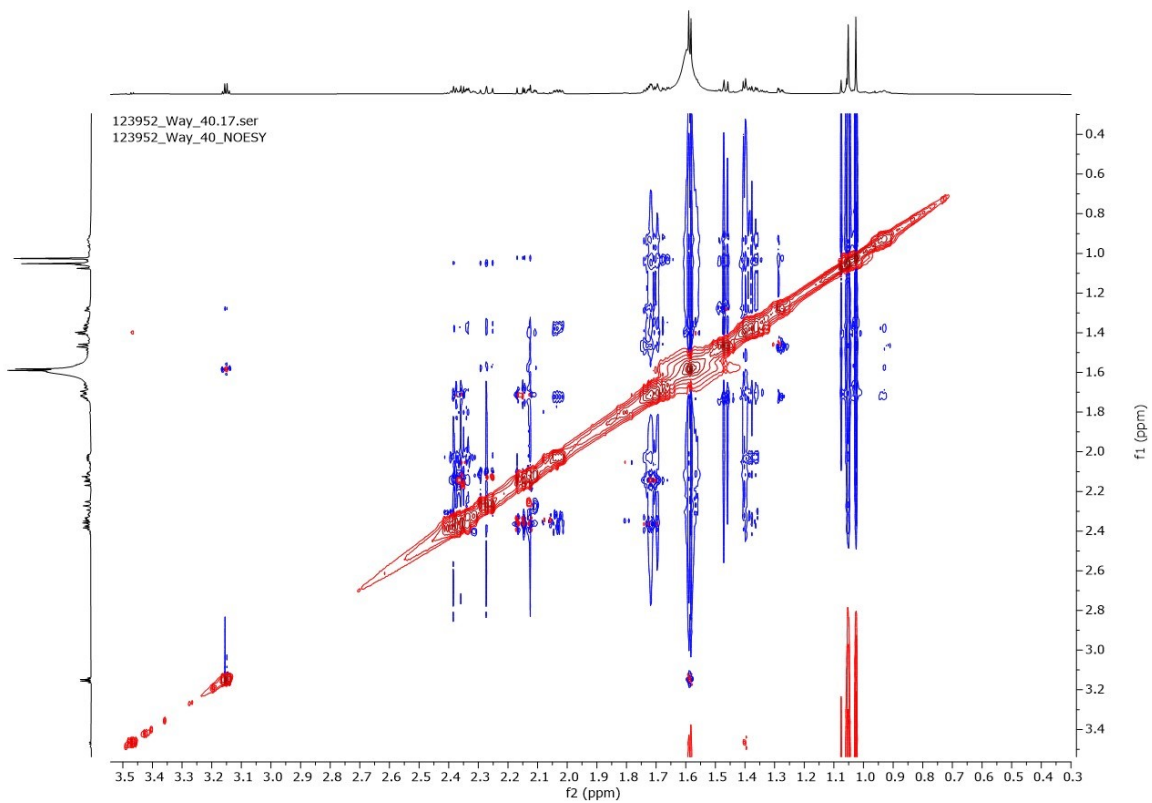

Figure S17 NOESY spectrum of compound **2**



## ECD calculation

Conformation search of **2** at MMFF94s force field gave one conformer of **2**. These conformers were optimized at B3LYP/6-31G(d) level, and then calculated the ECD at B3LYP/6-311G(d,p) level, nstates=20, IEFPCM, solvent=methanol.

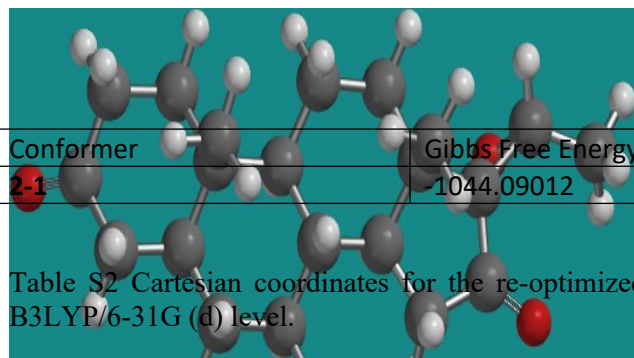

| Conformer  | Gibbs Free Energy (Hartree) | Population (%) |
|------------|-----------------------------|----------------|
| <b>2-1</b> | -1044.09012                 | 100            |

Table S2 Cartesian coordinates for the re-optimized conformers of compound **2** in the gas phase (Å) at B3LYP/6-31G (d) level.

| Conf- <b>2-1</b> | Atomic Number | Atomic Type | Coordinates (Angstroms) |          |          |
|------------------|---------------|-------------|-------------------------|----------|----------|
| <b>2-1</b>       |               |             |                         |          |          |
|                  |               |             | X                       | Y        | Z        |
| 1                | 6             | 0           | 3.128114                | -1.56955 | -0.39993 |
| 2                | 6             | 0           | 3.004397                | 0.927426 | -0.2299  |
| 3                | 6             | 0           | 5.266308                | -0.18474 | -0.57735 |
| 4                | 6             | 0           | 4.529573                | 1.018426 | -0.0077  |
| 5                | 6             | 0           | 4.661784                | -1.53635 | -0.22749 |
| 6                | 6             | 0           | 2.382753                | -0.40397 | 0.304169 |
| 7                | 6             | 0           | 0.86774                 | -0.41387 | -0.11225 |
| 8                | 6             | 0           | 0.098318                | 0.849608 | 0.382013 |
| 9                | 6             | 0           | 0.791169                | 2.141925 | -0.08212 |
| 10               | 6             | 0           | 2.277241                | 2.174222 | 0.290911 |
| 11               | 6             | 0           | -1.34574                | 0.765555 | -0.12737 |
| 12               | 6             | 0           | -2.10848                | -0.50791 | 0.347395 |
| 13               | 6             | 0           | -1.35989                | -1.73565 | -0.18676 |
| 14               | 6             | 0           | 0.119257                | -1.71959 | 0.253933 |
| 15               | 6             | 0           | -3.50043                | -0.24264 | -0.24046 |
| 16               | 6             | 0           | -3.6883                 | 1.281811 | -0.20731 |
| 17               | 6             | 0           | -2.33269                | 1.915608 | 0.13418  |
| 18               | 6             | 0           | 2.54094                 | -0.54633 | 1.835678 |
| 19               | 1             | 0           | 0.083606                | 0.854506 | 1.481432 |
| 20               | 6             | 0           | -2.2753                 | -0.58484 | 1.883916 |
| 21               | 1             | 0           | -1.27961                | 0.671192 | -1.22415 |
| 22               | 1             | 0           | 0.86389                 | -0.35133 | -1.2141  |
| 23               | 1             | 0           | 2.851912                | 0.909363 | -1.32176 |

|    |   |   |          |          |          |
|----|---|---|----------|----------|----------|
| 24 | 8 | 0 | 6.264891 | -0.07381 | -1.2634  |
| 25 | 8 | 0 | -4.70704 | 1.886076 | -0.46141 |
| 26 | 6 | 0 | -4.59958 | -1.22638 | -0.3039  |
| 27 | 8 | 0 | -3.87125 | -0.86576 | -1.48894 |
| 28 | 6 | 0 | -6.06971 | -0.89545 | -0.25069 |
| 29 | 1 | 0 | 2.762213 | -2.53488 | -0.03362 |
| 30 | 1 | 0 | 2.895372 | -1.53672 | -1.47376 |
| 31 | 1 | 0 | 4.751933 | 1.082552 | 1.067927 |
| 32 | 1 | 0 | 4.938535 | 1.921278 | -0.47281 |
| 33 | 1 | 0 | 4.92078  | -1.75207 | 0.819504 |
| 34 | 1 | 0 | 5.147045 | -2.30167 | -0.84069 |
| 35 | 1 | 0 | 0.277767 | 3.014787 | 0.340525 |
| 36 | 1 | 0 | 0.695369 | 2.225039 | -1.17568 |
| 37 | 1 | 0 | 2.392845 | 2.250064 | 1.38114  |
| 38 | 1 | 0 | 2.747345 | 3.07313  | -0.12888 |
| 39 | 1 | 0 | -1.83019 | -2.66563 | 0.160037 |
| 40 | 1 | 0 | -1.426   | -1.74148 | -1.28103 |
| 41 | 1 | 0 | 0.174366 | -1.88935 | 1.336173 |
| 42 | 1 | 0 | 0.622211 | -2.57476 | -0.21051 |
| 43 | 1 | 0 | -2.33486 | 2.237667 | 1.184927 |
| 44 | 1 | 0 | -2.17781 | 2.809143 | -0.47697 |
| 45 | 1 | 0 | 3.584586 | -0.45746 | 2.152265 |
| 46 | 1 | 0 | 2.191034 | -1.52754 | 2.173293 |
| 47 | 1 | 0 | 1.976182 | 0.210574 | 2.387635 |
| 48 | 1 | 0 | -2.82113 | -1.497   | 2.150883 |
| 49 | 1 | 0 | -1.31719 | -0.6086  | 2.410128 |
| 50 | 1 | 0 | -2.84539 | 0.260592 | 2.285244 |
| 51 | 1 | 0 | -4.34096 | -2.22724 | 0.054497 |
| 52 | 1 | 0 | -6.63025 | -1.59616 | -0.88043 |
| 53 | 1 | 0 | -6.25173 | 0.123942 | -0.59164 |
| 54 | 1 | 0 | -6.43959 | -0.99802 | 0.776663 |

| Functional |      | Solvent?     |          |          | Basis Set    |   |      |      |      |
|------------|------|--------------|----------|----------|--------------|---|------|------|------|
| mPW1PW91   |      | PCM          |          |          | 6-311+G(d,p) |   |      |      |      |
|            |      | DP4+         | 100.00%  | 0.00%    | -            |   |      |      |      |
| Nuclei     | sp2? | Experimental | Isomer 1 | Isomer 2 | Isomer 3     |   |      |      |      |
| C          |      | 38.1         | 36.7     | 36.8     |              | H | 2.03 | 2.10 | 2.10 |
| C          |      | 38           | 37.0     | 37.0     |              | H | 1.46 | 1.45 | 1.45 |
| C          |      | 211.4        | 216.0    | 216.1    |              | H | 2.35 | 2.65 | 2.65 |
| C          | x    | 44.5         | 43.7     | 43.6     |              | H | 2.03 | 2.29 | 2.27 |
| C          |      | 46.5         | 45.5     | 45.5     |              | H | 2.27 | 2.49 | 2.47 |
| C          |      | 28.6         | 26.6     | 26.4     |              | H | 2.11 | 2.08 | 2.05 |
| C          |      | 31.4         | 29.5     | 29.4     |              | H | 1.58 | 1.61 | 1.61 |
| C          |      | 34.6         | 33.8     | 33.3     |              | H | 1.37 | 1.61 | 1.6  |
| C          |      | 53.4         | 51.4     | 51.0     |              | H | 1.37 | 1.33 | 1.35 |
| C          |      | 35.9         | 36.3     | 36.3     |              | H | 1.7  | 1.77 | 1.76 |
| C          |      | 20.1         | 18.6     | 18.8     |              | H | 1.03 | 1.12 | 1.12 |
| C          |      | 30.2         | 28.20    | 31.40    |              | H | 1.67 | 1.8  | 1.85 |
| C          |      | 39.8         | 40.00    | 39.80    |              | H | 0.93 | 0.99 | 1.05 |
| C          |      | 48.5         | 46.00    | 47.40    |              | H | 1.46 | 1.64 | 1.63 |
| C          |      | 39.7         | 39.40    | 37.20    |              | H | 1.71 | 1.71 | 1.7  |
| C          | x    | 215.2        | 226.00   | 224.40   |              | H | 1.28 | 1.28 | 1.58 |
| C          |      | 69           | 66.60    | 67.90    |              | H | 1.46 | 1.57 | 1.81 |
| C          |      | 16.8         | 11.50    | 9.80     |              | H | 1.71 | 1.8  | 1.89 |
| C          |      | 11.5         | 6.80     | 6.70     |              | H | 2.37 | 2.4  | 2.25 |
| C          |      | 57.2         | 57.50    | 56.30    |              | H | 2.15 | 2.4  | 2.37 |
| C          |      | 12.7         | 9.00     | 10.90    |              | H | 1.02 | 1.21 | 1.54 |
|            |      |              |          |          |              | H | 1.05 | 1.26 | 1.37 |
|            |      |              |          |          |              | H | 3.15 | 3.33 | 3.53 |
|            |      |              |          |          |              | H | 1.58 | 1.51 | 1.74 |

| Functional       | Solvent? |          | Basis Set    |          |
|------------------|----------|----------|--------------|----------|
| mPW1PW91         | PCM      |          | 6-311+G(d,p) |          |
|                  | Isomer 1 | Isomer 2 | Isomer 3     | Isomer 4 |
| sDP4+ (H data)   | 99.97%   | 0.03%    | -            | -        |
| sDP4+ (C data)   | 51.93%   | 48.07%   | -            | -        |
| sDP4+ (all data) | 99.97%   | 0.03%    | -            | -        |
| uDP4+ (H data)   | 99.99%   | 0.01%    | -            | -        |
| uDP4+ (C data)   | 9.29%    | 90.71%   | -            | -        |
| uDP4+ (all data) | 99.93%   | 0.07%    | -            | -        |
| DP4+ (H data)    | 100.00%  | 0.00%    | -            | -        |
| DP4+ (C data)    | 9.96%    | 90.04%   | -            | -        |
| DP4+ (all data)  | 100.00%  | 0.00%    | -            | -        |

Figure S18 NMR calculation (DP4+ analysis) of compound 2

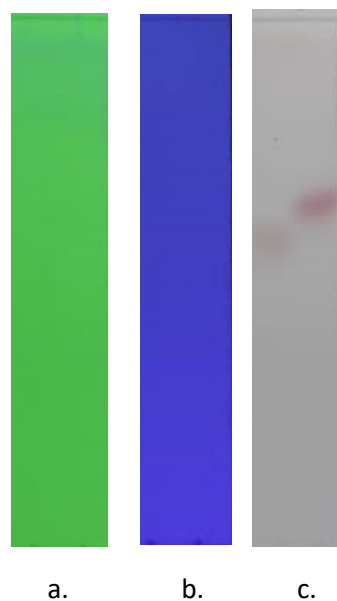

Figure S19 TLC profile of compounds **1** (left) and **2** (right) in Merck pre-coated silica gel 60 F<sub>254</sub> plates in *n*-hexane: DCM: EtOAc (7:2:1) at a. UV 254 nm, b. UV 365 nm, c. H<sub>2</sub>SO<sub>4</sub> spray
